# Supplementary material for: Comparative analysis of dimethyl fumarate and fingolimod in relapsing–remitting multiple sclerosis
Source: Springer Nature journal article supplement (doi:10.1007/s00415-020-10226-6), 2020-09-24

**Supplementary Table 1:** Baseline characteristics of the dataset used to determine disability progression.

| Variable                           | Unmatched     |                   |       | Matched                 |                         |      |
|------------------------------------|---------------|-------------------|-------|-------------------------|-------------------------|------|
|                                    | Fingolimod    | Dimethyl fumarate | SMD   | Fingolimod              | Dimethyl fumarate       | SMD  |
| n                                  | 625           | 597               |       | 516 (83% <sup>†</sup> ) | 516 (86% <sup>†</sup> ) |      |
| Age, mean, years (SD)              | 39.2 (10.9)   | 41.6 (11.4)       | 0.21  | 40.3 (11.0)             | 41.0 (11.3)             | 0.07 |
| Gender (female, %)                 | 424 (68%)     | 431 (72%)         | 0.10  | 361 (70%)               | 365 (71%)               | 0.02 |
| Disease duration, mean, years (SD) | 7.9 (8.2)     | 8.9 (8.0)         | 0.13  | 8.4 (8.5)               | 8.5 (7.7)               | 0.02 |
| EDSS, median (IQR)                 | 2.0 (1.5-3.0) | 2.0 (1.5-3.0)     | 0.005 | 2.0 (1.5-3.0)           | 2.0 (1.5-3.0)           | 0.02 |
| Preceding treatment, n (%)         |               |                   |       |                         |                         |      |
| Naïve                              | 280 (45%)     | 196 (32%)         |       | 199 (39%)               | 189 (37%)               |      |
| IFN beta 1a i.m.                   | 62 (10%)      | 97 (16%)          |       | 59 (11%)                | 72 (14%)                |      |
| IFN beta 1a s.c.                   | 72 (12%)      | 92 (15%)          |       | 71 (14%)                | 72 (14%)                |      |
| IFN beta 1b s.c.                   | 55 (9%)       | 68 (11%)          |       | 53 (10%)                | 57 (11%)                |      |
| Glatiramer acetate                 | 56 (9%)       | 59 (10%)          |       | 52 (10%)                | 49 (10%)                |      |
| Teriflunomide                      | 14 (2%)       | 21 (4%)           |       | 14 (3%)                 | 15 (3%)                 |      |
| Natalizumab                        | 83 (13%)      | 62 (10%)          |       | 66 (13%)                | 60 (12%)                |      |

|                                                           |           |           |      |           |           |      |
|-----------------------------------------------------------|-----------|-----------|------|-----------|-----------|------|
| Number of relapses in the year before baseline, mean (SD) | 0.6 (0.8) | 0.5 (0.7) | 0.11 | 0.6 (0.8) | 0.5 (0.8) | 0.06 |
|-----------------------------------------------------------|-----------|-----------|------|-----------|-----------|------|

†proportion of retained patients after matching

SMD = standardized mean difference; SD = standard deviation; EDSS = expanded disability status scale; IQR = interquartile range; IFN = interferon; DMT = disease modifying treatment

**Supplementary table 2:** Logistic model used to determine the propensity scores

| <b>Independent variable</b>       | <b>Estimate (SE)</b> | <b>p-value</b> |
|-----------------------------------|----------------------|----------------|
| Gender, male                      | -0.0044 (0.1809)     | 0.9805         |
| Age                               | 0.0053 (0.0088)      | 0.5420         |
| Disease duration                  | 0.0001 (0.0138)      | 0.9966         |
| EDSS                              | 0.0157 (0.1291)      | 0.9033         |
| EDSS increase in last year        | -0.1836 (0.2166)     | 0.3968         |
| Preceding relapse rate            | -0.1715 (0.0762)     | 0.0245         |
| Visual FSS                        | -0.0129 (0.1159)     | 0.9112         |
| Brainstem FSS                     | 0.1111(0.1381)       | 0.4209         |
| Pyramidal FSS                     | -0.0404 (0.1136)     | 0.7220         |
| Cerebellar FSS                    | -0.1762 (0.1282)     | 0.1692         |
| Sensory FSS                       | 0.0833 (0.1014)      | 0.4117         |
| Bowel and bladder FSS             | 0.1254 (0.1257)      | 0.3186         |
| Cerebral FSS                      | -0.1821 (0.1021)     | 0.0746         |
| Time on previous DMT              | -0.0330 (0.0233)     | 0.1568         |
| Number of previous DMT            | 0.4208 (0.1966)      | 0.0350         |
| Time since last relapse           | 0.0269 (0.0271)      | 0.3204         |
| North-Western region <sup>†</sup> | 0.4307 (0.3344)      | 0.1977         |
| Northern region <sup>†</sup>      | -0.0088 (0.3314)     | 0.9789         |
| Central region <sup>†</sup>       | 0.2626 (0.3512)      | 0.4546         |
| Eastern region <sup>†</sup>       | 0.8625 (0.3067)      | 0.0050         |

|                              |                 |        |
|------------------------------|-----------------|--------|
| Southern region <sup>†</sup> | 0.0732 (0.4798) | 0.8788 |
|------------------------------|-----------------|--------|

Propensity for treatment with dimethyl fumarate vs. fingolimod (reference) at baseline.

SE = Standard error, EDSS = Expanded disability status scale, FS = Functional System Score,

DMT = Disease modifying treatment

<sup>†</sup>The South-Western region is used as a reference.

**Supplementary Table 3: Sensitivity analyses**

| <b>1) Matching with a calliper of 0.1</b>                    |                                             |                |
|--------------------------------------------------------------|---------------------------------------------|----------------|
|                                                              | <b>†HR (95% CI)</b><br><b>‡IRR (95% CI)</b> | <b>p-value</b> |
| Free from relapses <sup>†</sup>                              | 1.1 (0.9-1.4)                               | 0.53           |
| ARR <sup>‡</sup>                                             | 1.1 (0.9-1.4)                               | 0.32           |
| Free from disability worsening <sup>†</sup>                  | 1.0 (0.6-1.7)                               | 0.99           |
| Disability improvement <sup>†</sup>                          | 0.9 (0.6-1.3)                               | 0.80           |
| <b>1) No pairwise censoring</b>                              |                                             |                |
| Free from relapses <sup>†</sup>                              | 1.1 (0.9-1.4)                               | 0.37           |
| ARR <sup>‡</sup>                                             | 1.1 (0.9-1.3)                               | 0.37           |
| Free from disability worsening <sup>†</sup>                  | 0.8 (0.5-1.2)                               | 0.22           |
| Disability improvement <sup>†</sup>                          | 0.8 (0.6-1.2)                               | 0.26           |
| <b>3) Including patients irrespective of treatment start</b> |                                             |                |
| Free from relapses <sup>†</sup>                              | 0.9 (0.7-1.1)                               | 0.24           |
| ARR <sup>‡</sup>                                             | 1.2 (1.0-1.4)                               | 0.11           |
| Free from disability worsening <sup>†</sup>                  | 1.0 (0.6-1.5)                               | 0.93           |
| Disability improvement <sup>†</sup>                          | 0.9 (0.6-1.2)                               | 0.29           |

Comparison of dimethyl fumarate vs. fingolimod (reference).

<sup>†</sup>For the proportions of patients without relapse, without disability progression and with disability improvement, Cox marginal proportional hazards models are used.

<sup>‡</sup>ARRs are compared with negative binomial models.

HR = hazard ratio, IRR = incident rate ratio; CI = confidence interval; ARR = annualised relapse rate

**Supplementary figure.** Distribution of propensity scores before and after matching

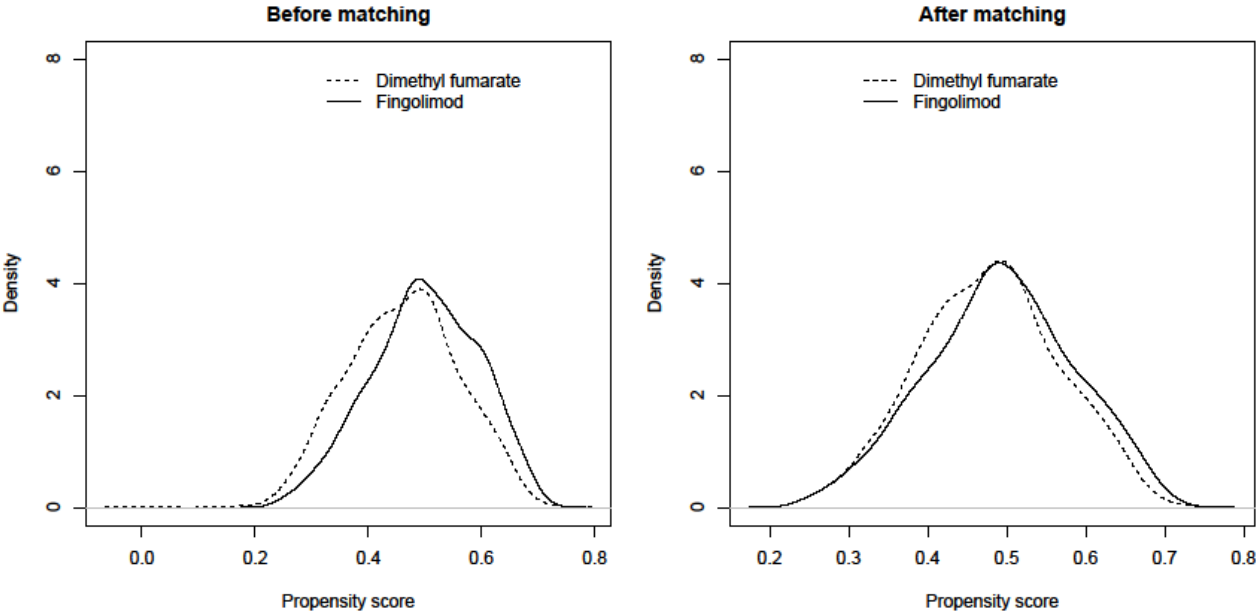

Supplement: MOESM1 [file 18412348]
